# Supplementary material for: Germanene on single-layer ZnSe substrate: novel electronic and optical properties
Source: Royal Society of Chemistry journal article supplement (doi:10.1039/c8cp00870a), 2018-01-01
Supplement: c8cp00870a1.pdf [file c8cp00870a1.pdf]

## Supporting Information

### An electric field and strain tunable band gap in the germanene/ZnSe heterostructure

F. F. Hu,<sup>‡ab</sup> H. Y. Ye,<sup>‡ab</sup> H. Y. Tang,<sup>‡c</sup>

<sup>a</sup> *Key Laboratory of Optoelectronic Technology & Systems, Education Ministry of China, Chongqing University and College of Optoelectronic Engineering, Chongqing University, 400044 Chongqing, China.*

<sup>b</sup> *College of Optoelectronic Engineering, Chongqing University, Chongqing 400044, China*

<sup>c</sup> *Electronic Components, Technology and Materials, Delft University of Technology, Delft 2628 CD, The Netherlands.*

E-mail: [h.ye@tudelft.nl](mailto:h.ye@tudelft.nl).

#### Contents:

Figure S1: The electronic band structures of (a) AAI, (b) ABI, and (c) ABII patterns, respectively. (d), (e) and (f) the total and partial density of states (DOS & PDOS) of three patterns, respectively.

Figure S2: Charge density difference (CDD) of (a) AAI, (b) ABI and (c) ABII patterns in germanene/ZnSe heterostructures. The isosurface value is  $0.003 e \text{ \AA}^{-3}$ .

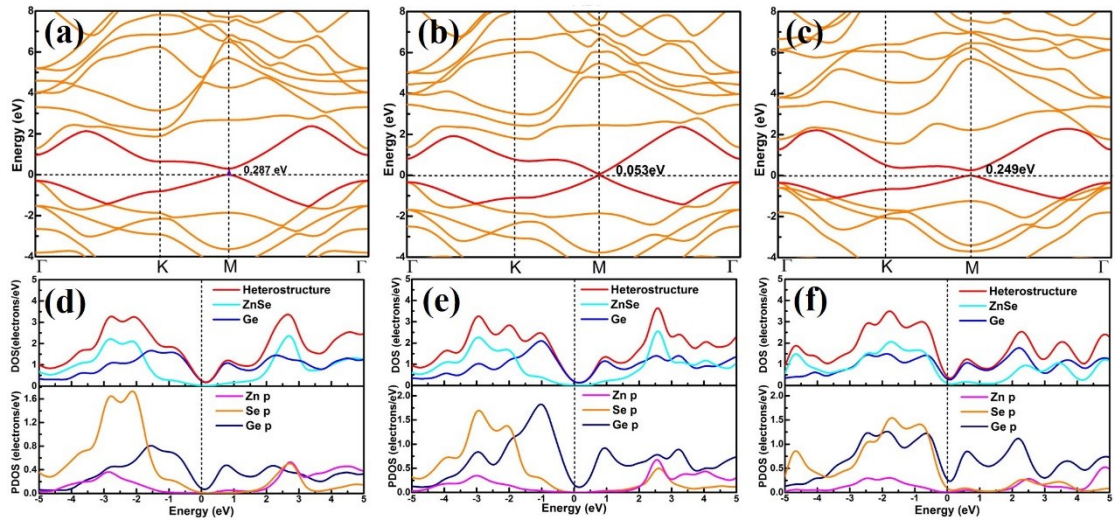

Figure S1: The electronic band structures of (a) AAI, (b) ABI, and (c) ABII patterns, respectively. (d), (e) and (f) the total and partial density of states (DOS & PDOS) of three patterns, respectively.

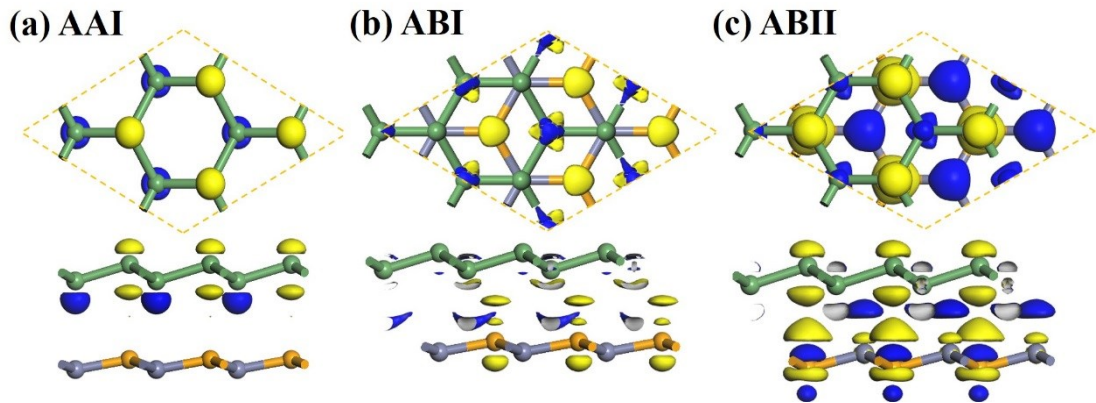

Figure S2: Charge density difference (CDD) of (a)AAI, (b) ABI and (c) ABII patterns in germanene/ZnSe heterostructures. The isosurface value is  $0.003 \text{ e } \text{\AA}^{-3}$ .
